# Supplementary material
Source: publisher site journal article supplement (https://www.spandidos-publications.com/7541/downloadSupplementary)

Figure S1. miR-23b-3p and miR-124-3p expression in cervical cancer cell lines. Quantification of miR-23b-3p and miR-124-3p expression levels in HaCaT, C-33A and CaSki cells by reverse transcription-quantitative PCR. The expression of miRNAs was normalized with RNU6 and calculated by the  $2^{-\Delta\Delta Cq}$  method. \*\*\*P<0.0001. miR, microRNA.

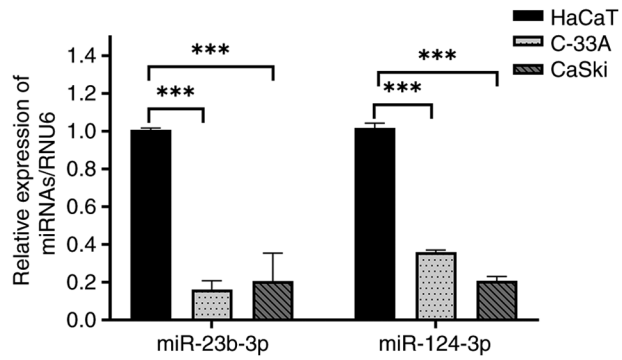

Figure S2. Overexpression of miR-23b-3p and miR-124-3p. The expression levels of miR-23b-3p and miR-124-3p were determined by reverse transcription-quantitative PCR in (A) C-33A and (B) CaSki cells transfected with 100 nM of the corresponding 24 h mimetic miRNA. The expression of miRNAs was normalized with RNU6 and calculated by the  $2^{-\Delta\Delta Cq}$  method. \* $P < 0.05$ , \*\* $P < 0.001$ , \*\*\* $P < 0.0001$ . miR, microRNA.

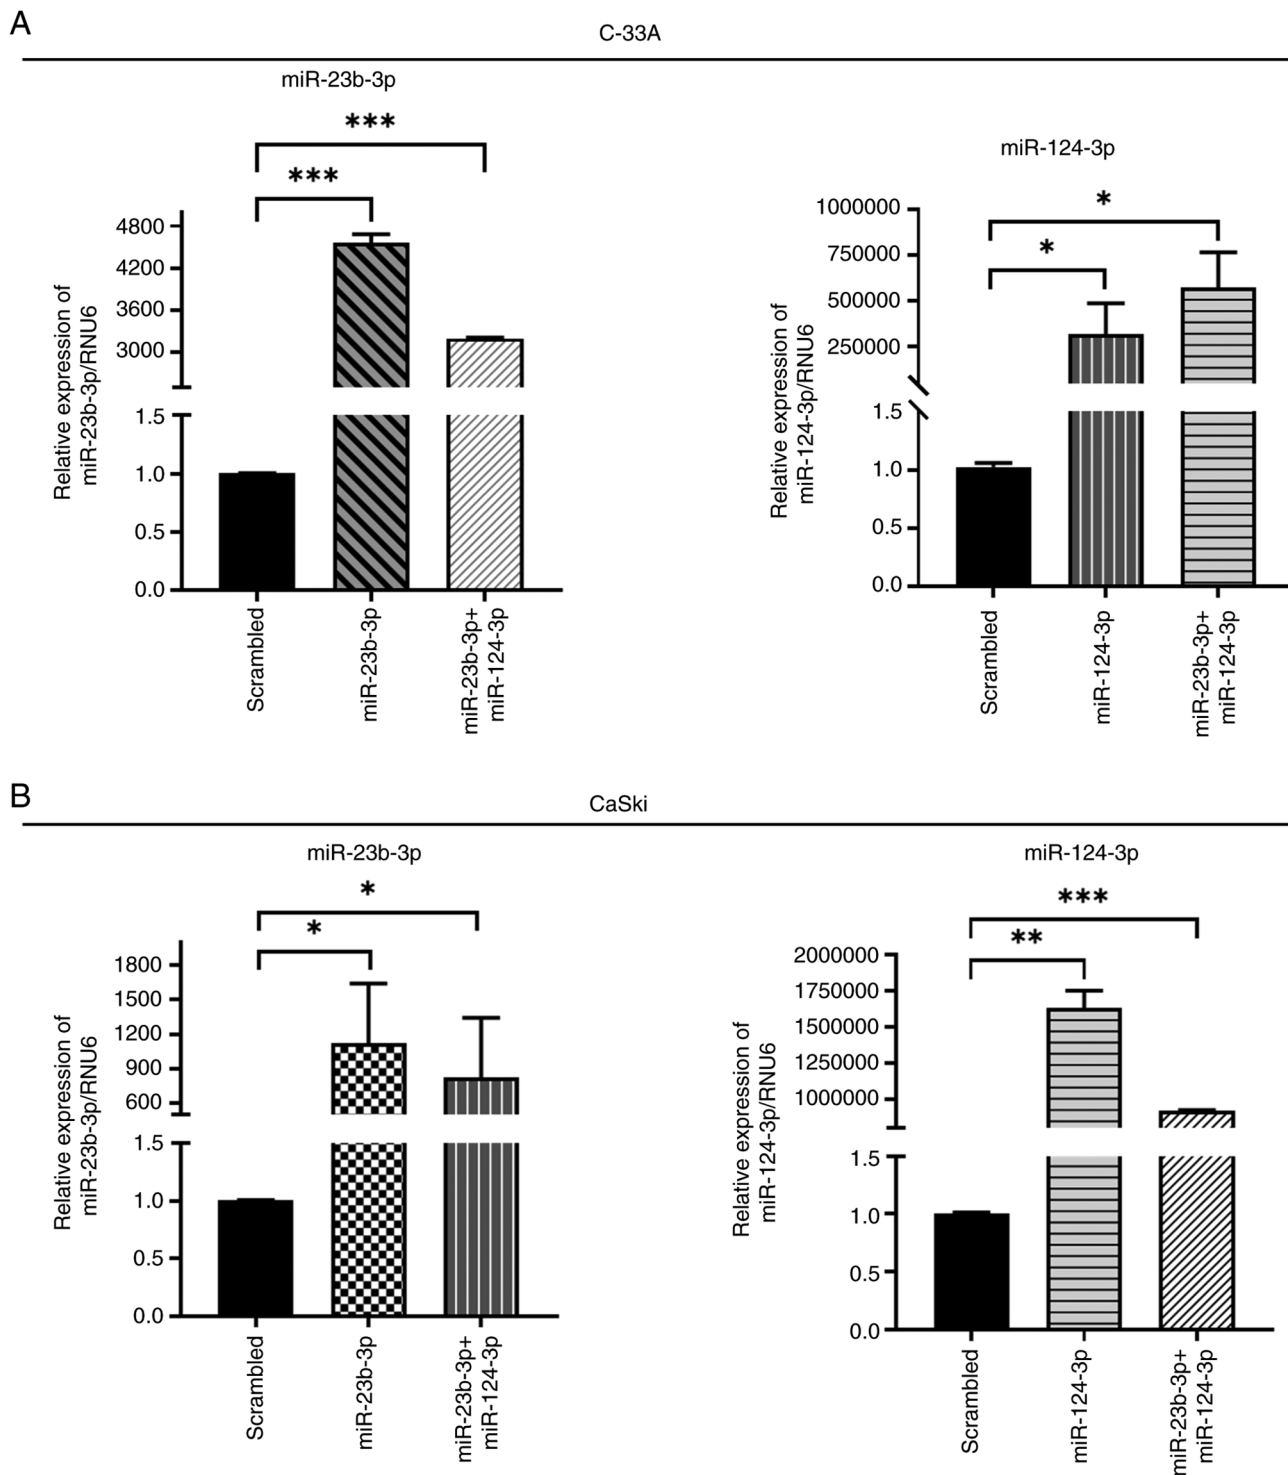

Supplement: Supplementary file 1 [file downloadSupplementary]
